# Supplementary material for: Causal influences of El Niño–Southern Oscillation on global dust activities
Source: Copernicus journal article supplement (doi:10.5194/acp-2021-1055), 2022-02-07
Supplement: Supplementary file 1 [file acp-2021-1055-supplement.pdf]

1 Supporting Information for

2 **Causal influences of El Niño–Southern Oscillation on global dust activities**

3 Thanh Le<sup>1\*</sup> and Deg-Hyo Bae<sup>1\*</sup>

4 <sup>1</sup>Department of Civil and Environmental Engineering, Sejong University, Seoul 05006, Republic  
5 of Korea

6 \*Corresponding author(s): Deg-Hyo Bae ([dhbae@sejong.ac.kr](mailto:dhbae@sejong.ac.kr)) and Thanh Le  
7 ([levinhthanh.lvt@gmail.com](mailto:levinhthanh.lvt@gmail.com))

8

9 **Contents of this Supporting Information**

10

11 Text S1

12 Table S1-S2

13 Figures S1-S3

## 14 **Text S1**

15 We use the following multivariate predictive model (Mosedale et al., 2006; Stern and Kaufmann,  
16 2013) to estimate the causal links between the ENSO and dust deposition:

$$17 \mathbf{X}_t = \sum_{i=1}^p \alpha_i \mathbf{X}_{t-i} + \sum_{i=1}^p \beta_i \mathbf{Y}_{t-i} + \sum_{j=1}^m \sum_{i=1}^p \delta_{j,i} \mathbf{Z}_{j,t-i} + \boldsymbol{\varepsilon}_t \quad (1)$$

18 where  $X_t$  is the annual mean (or seasonal mean) dust deposition for year  $t$ ,  $Y_t$  is the ENSO index,  
19 and  $Z_{j,t}$  is the confounding factor  $j$  for year  $t$ . In the predictive model shown in equation 1, while  
20 estimating the influence of  $Y$  on  $X$  (i.e., the contribution of the term  $\sum_{i=1}^p \beta_i Y_{t-i}$  in predicting  $X$ ),  
21 the contribution of past  $X$  events are already taken into account by adding the term  $\sum_{i=1}^p \alpha_i X_{t-i}$ .  
22 Thus, the causal influence of  $Y$  on  $X$ , if detected, is robust and the contribution of past  $X$  events  
23 are already considered in our analyses. Here,  $m$  is number of confounding factors and  $p \geq 1$  is the  
24 order of the multivariate predictive model. The optimal order  $p$  is less than 8 ( $p$  is an integer with  
25 units of year, computed by minimizing the Schwarz criterion or the Bayesian information  
26 criterion (Schwarz, 1978)), hence, the connection between dust deposition and ENSO is  
27 investigated at interannual timescales. The optimal orders might be different for each model.

28 The ENSO index was computed as the average sea surface temperature (SST) anomalies in the  
29 Niño 3.4 area (120–170°W; 5°N–5°S) in boreal winter (December–January–February, DJF).  
30 Confounding factors (i.e., the dipole mode index (DMI; Saji et al., 1999), the Southern Annular  
31 Mode (SAM) and the North Atlantic Oscillation (NAO; e.g., Hurrell et al., 2003)) may have  
32 effects on the connections between ENSO and dust deposition. The DMI was given as the  
33 difference in boreal fall (September–October–November, SON) SST anomalies between two  
34 Indian Ocean regions of the western pole (50–70°E; 10°N–10°S) and southeastern pole (90–  
35 110°E; 0°N–10°S). The SAM (Cai et al., 2011) was calculated as the first empirical orthogonal  
36 function (EOF) of the boreal summer (June–July–August, JJA) sea level pressure (SLP)  
37 anomalies for the region of 40–70°S. The NAO index is computed as the EOF of boreal winter  
38 (DJF) SLP anomalies in the North Atlantic area (90°W–40°E, 20°–70°N).

39 Here we consider the simultaneous impacts of confounding factors and thus provide more  
40 information of the real-world teleconnections. Our analysis uses three different confounding  
41 factors; thus,  $m$  is equal to 3. The noise residuals  $\varepsilon_t$  and the regression coefficients  $\alpha_i$ ,  $\beta_i$  and  $\delta_{j,i}$

42 are the results of the multiple linear regression analysis using the least squares method. We  
43 detrend and normalize all the climate indices.

44 We estimate the probability of no Granger causality by applying a test of Granger causality (Le  
45 and Bae, 2020; Mosedale et al., 2006; Stern and Kaufmann, 2013) for the multivariate predictive  
46 model shown in equation 1.

47 For computing the degree of uncertainty, we followed recent guidance (Stocker et al., 2013) and  
48 utilized the terms ‘very unlikely’, ‘unlikely’, ‘likely’ for the 0–10%, 0–33%, and 66–100%  
49 probability of the likelihood of the outcome, respectively. For example, if the  $p$ -value is less than  
50 0.33, the result indicates that ENSO is unlikely to display no Granger causality on dust  
51 deposition. In this instance, we conclude that ENSO has ‘causal effect’ on dust deposition.

## 52 **References**

53 Cai, W., Sullivan, A. and Cowan, T.: Interactions of ENSO, the IOD, and the SAM in CMIP3  
54 Models, *J. Clim.*, 24(6), 1688–1704, doi:10.1175/2010JCLI3744.1, 2011.

55 Hurrell, J. W., Kushnir, Y., Ottersen, G. and Visbeck, M.: An overview of the North Atlantic  
56 Oscillation, in *Geophysical Monograph American Geophysical Union*, pp. 1–35, American  
57 Geophysical Union., 2003.

58 Le, T. and Bae, D.-H.: Response of global evaporation to major climate modes in historical and  
59 future Coupled Model Intercomparison Project Phase 5 simulations, *Hydrol. Earth Syst. Sci.*,  
60 24(3), 1131–1143, doi:10.5194/hess-24-1131-2020, 2020.

61 Mosedale, T. J., Stephenson, D. B., Collins, M. and Mills, T. C.: Granger Causality of Coupled  
62 Climate Processes: Ocean Feedback on the North Atlantic Oscillation, *J. Clim.*, 19(7), 1182–  
63 1194, doi:10.1175/JCLI3653.1, 2006.

64 Saji, N. H., Goswami, B. N., Vinayachandran, P. N. and Yamagata, T.: A dipole mode in the  
65 tropical Indian Ocean, *Nature*, 401(6751), 360–363, doi:10.1038/43854, 1999.

66 Schwarz, G.: Estimating the dimension of a model, *Ann. Stat.* [online] Available from:  
67 <http://projecteuclid.org/euclid.aos/1176344136> (Accessed 30 May 2014), 1978.

68 Stern, D. I. and Kaufmann, R. K.: Anthropogenic and natural causes of climate change, *Clim.*  
69 *Change*, 122(1–2), 257–269, doi:10.1007/s10584-013-1007-x, 2013.

70 Stocker, T. F., Qin, D., Plattner, G.-K., Alexander, L. V., Allen, S. K., Bindoff, N. L., Bréon, F.-  
71 M., Church, J. A., Cubasch, U., Emori, S., Forster, P., Friedlingstein, P., Gillett, N., Gregory, J.  
72 M., Hartmann, D. L., Jansen, E., Kirtman, B., Knutti, R., Kumar, K. K., Lemke, P., Marotzke, J.,  
73 Masson-Delmotte, V., Meehl, G. A., Mokhov, I. I., Piao, S., Ramaswamy, V., Randall, D., Rhein,  
74 M., Rojas, M., Sabine, C., Shindell, D., Talley, L. D., Vaughan, D. G. and Xie, S.-P.: Technical  
75 Summary, in *Climate Change 2013 - The Physical Science Basis*, edited by Intergovernmental  
76 Panel on Climate Change, pp. 31–116, Cambridge University Press, Cambridge., 2013.



78 **Table S1.** List of CMIP6 models used in this study.

| No. | Model name      | Modelling center, country | Aerosol model    | Atmospheric Chemistry model     |
|-----|-----------------|---------------------------|------------------|---------------------------------|
| 1   | CanESM5         | CCCma, Canada             | Interactive      | Specified oxidants for aerosols |
| 2   | CESM2           | NCAR, United States       | MAM4             | MAM4                            |
| 3   | CESM2_FV2       | NCAR, United States       | MAM4             | MAM4                            |
| 4   | CESM2_WACCM     | NCAR, United States       | MAM4             | MAM4                            |
| 5   | CESM2_WACCM_FV2 | NCAR, United States       | MAM4             | MAM4                            |
| 6   | CNRM_ESM2_1     | CNRM-CERFACS, France      | TACTIC_v2        | REPROBUS-C_v2                   |
| 7   | GFDL_ESM4       | NOAA-GFDL, United States  | Interactive      | GFDL-ATMCHEM4.1                 |
| 8   | INM-CM4-8       | INM, Russia               | INM-AER1         | None                            |
| 9   | INM-CM5-0       | INM, Russia               | INM-AER1         | None                            |
| 10  | MIROC-ES2L      | MIROC Japan               | SPRINTARS6.0     | None                            |
| 11  | MIROC6          | MIROC, Japan              | SPRINTARS6.0     | None                            |
| 12  | UKESM1_0_LL     | MOHC NERC, United Kingdom | UKCA-GLOMAP-mode | UKCA-StratTrop                  |

79 **Table S2.** List of CMIP6 models used in this study with available data denoted by a check mark (✓). The  
 80 data unavailable are denoted by a cross (×).

| No. | Model name      | Modelling center, country | dry dust | wet dust | od550dust | emidust |
|-----|-----------------|---------------------------|----------|----------|-----------|---------|
| 1   | CanESM5         | CCCma, Canada             | ✓        | ✓        | ✓         | ✓       |
| 2   | CESM2           | NCAR, United States       | ✓        | ✓        | ✓         | ✓       |
| 3   | CESM2_FV2       | NCAR, United States       | ✓        | ✓        | ✓         | ✓       |
| 4   | CESM2_WACCM     | NCAR, United States       | ✓        | ✓        | ✓         | ✓       |
| 5   | CESM2_WACCM_FV2 | NCAR, United States       | ✓        | ✓        | ✓         | ✓       |
| 6   | CNRM_ESM2_1     | CNRM-CERFACS, France      | ✓        | ✓        | ×         | ✓       |
| 7   | GFDL_ESM4       | NOAA-GFDL, United States  | ✓        | ✓        | ×         | ×       |
| 8   | INM-CM4-8       | INM, Russia               | ✓        | ✓        | ✓         | ✓       |
| 9   | INM-CM5-0       | INM, Russia               | ✓        | ✓        | ✓         | ✓       |
| 10  | MIROC-ES2L      | MIROC Japan               | ✓        | ✓        | ×         | ✓       |
| 11  | MIROC6          | MIROC, Japan              | ✓        | ✓        | ✓         | ✓       |
| 12  | UKESM1_0_LL     | MOHC NERC, United Kingdom | ✓        | ✓        | ✓         | ✓       |

81

MODELS MEAN: ENSO - SPRING DRY DUST PERIOD 1850-2014 EXPERIMENT HISTORICAL      MODELS MEAN: ENSO - SUMMER DRY DUST PERIOD 1850-2014 EXPERIMENT HISTORICAL

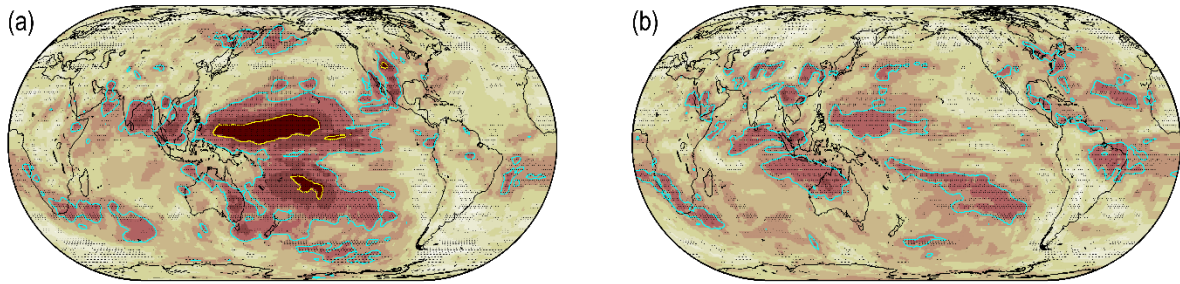

MODELS MEAN: ENSO - FALL DRY DUST PERIOD 1850-2014 EXPERIMENT HISTORICAL      MODELS MEAN: ENSO - WINTER DRY DUST PERIOD 1850-2014 EXPERIMENT HISTORICAL

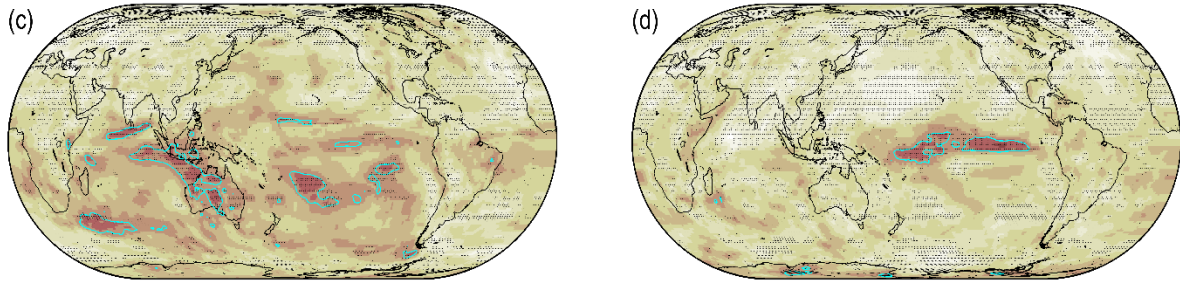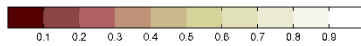

82

83 **Figure S1.** Multi-model mean probability map of no Granger causality from ENSO [DJF] to the  
84 following seasonal mean dry dust deposition over the period 1850-2014 of the historical simulation. (a)  
85 Spring [MAM]. (b) Summer [JJA]. (c) Fall [SON]. (d) Winter [DJF]. Stippling demonstrates that at least  
86 70% of total models show agreement on the mean probability of all models at a given grid point. The  
87 cyan and yellow contour lines signify  $p$ -value = 0.33 and 0.1, respectively. Brown shades denote a low  
88 probability for the absence of Granger causality. ENSO: El Niño–Southern Oscillation.

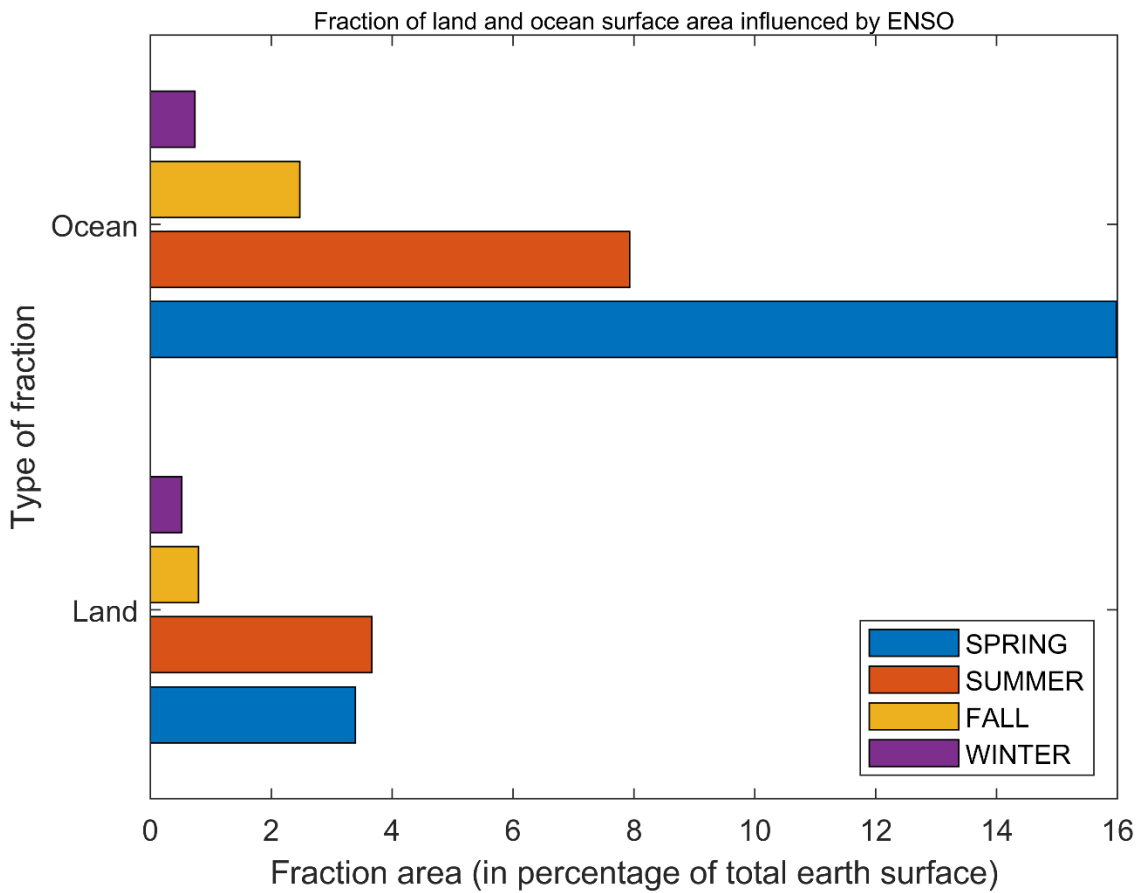

89

90 **Figure S2.** Fraction of total Earth-surface over land and ocean with probability for no Granger causality  
 91 from ENSO to seasonal mean dry dust deposition lower than 0.33 (i.e.,  $p$ -value < 0.33). Fraction areas  
 92 influenced by ENSO on Spring, Summer, Fall and Winter dry dust deposition are displayed in blue, red,  
 93 yellow, and purple bars, respectively. ENSO: El Niño–Southern Oscillation.



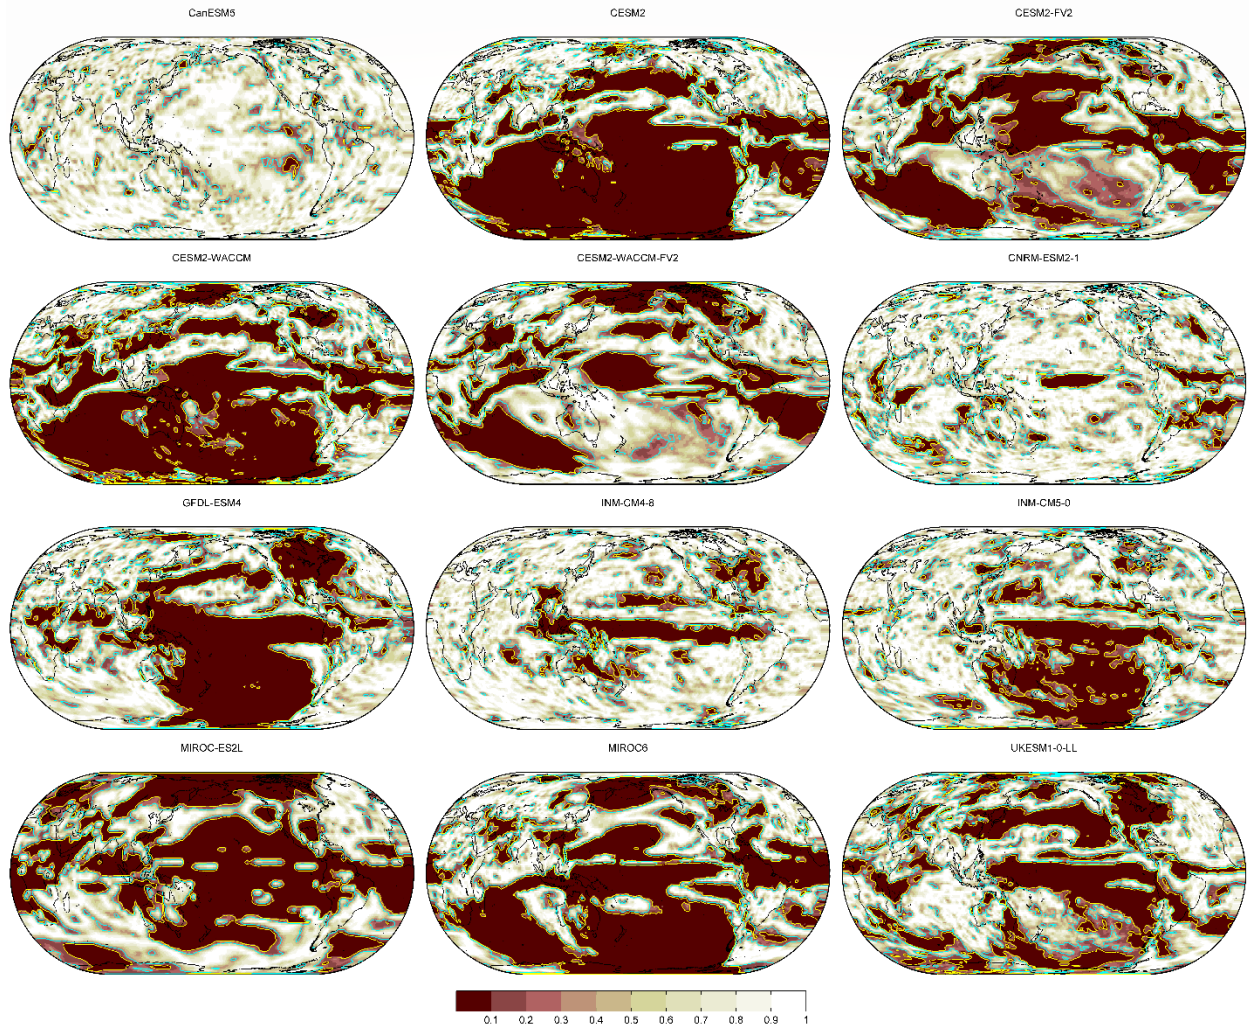

94

95 **Figure S3.** As in Figure 1, but for the probability of no Granger causality of ENSO on annual mean wet  
 96 dust deposition over the period 1850–2014 for the historical simulation of 12 individual models (see  
 97 Tables S1 and S2). ENSO: El Niño–Southern Oscillation.
