# Supplementary material for: Causal influences of El Niño–Southern Oscillation on global dust activities
Source: Copernicus journal article supplement (doi:10.5194/acp-2021-1055), 2022-02-07
Supplement: Supplementary file [file acp-2021-1055-AC1-supplement.pdf]

1 **1 Response to Reviewer #1's comments**

2 The manuscript by Thanh Le and Deg-Hyo Bae attempt to investigate the influences of El Niño  
3 Southern Oscillation (ENSO) on global dust activities by using the historical simulations of Global  
4 Climate Models (GCMs) from CMIP6 and developing the multivariate predictive model. The  
5 authors find that the ENSO displays significant impacts on dust deposition and transportation,  
6 while exhibits almost no impact on the dust emission of major dust sources. These findings  
7 emphasize the important role of ENSO in global dust activities. Overall, this paper is well written,  
8 and their findings exhibit promising potential for the predictions of future dust events. I would like  
9 to recommend an acceptance after these comments as follows are addressed.

10 **Response:** We thank the reviewer for your comments. We modified the manuscript based on your  
11 suggestions as below.

12 **Major comments:**

13 1.1 (1) To estimate the influences of ENSO on dust deposition, the authors selected the  
14 multivariate predictive model that has already considered the contribution of past dust  
15 deposition events and the confounding factors. In the multivariate predictive model, three  
16 factors, including Indian Ocean Dipole, Southern Annular Mode, and the North Atlantic  
17 Oscillation, have been considered as the major confounding factors that may display  
18 important roles in global dust deposition. However, the authors didn't elaborate on the  
19 reasons why they only selected the above three factors. I suggest the authors to provide  
20 sufficient justification for selecting the three factors to improve the reliability and robustness  
21 of the predictive model and their corresponding findings.

22 **Response:** We thank the reviewer for raising this point. We added the following sentences to  
23 Section 2.2 to explain the selection of the three factors Indian Ocean Dipole, Southern Annular  
24 Mode, and the North Atlantic Oscillation:

25 “The climate modes SAM, the IOD and the NAO are the important sources of global climate  
26 variability (Hurrell et al., 2003; Luo et al., 2012; Roxy et al., 2015). For instance, the NAO is the  
27 prominent mode of atmospheric circulation variability over the North Atlantic and surrounding  
28 regions (Delworth et al., 2016; Hurrell et al., 2003) and variations in NAO are crucial for the

29 environment and society (Hurrell et al., 2003). The IOD affects climate extremes over the Indian  
30 Ocean and surrounding areas (Abram et al., 2008; Kripalani et al., 2009; Kripalani and Kulkarni,  
31 1997) and might cause severe economic consequences (Ummenhofer et al., 2009). The SAM is  
32 the major mode of atmospheric circulation variability in the southern Hemisphere (Cai et al., 2011;  
33 Raphael and Holland, 2006). In addition, changes in these modes may affect the variations of  
34 ENSO (Abram et al., 2020; Cai et al., 2011, 2019; Le et al., 2020; Le and Bae, 2019). Nevertheless,  
35 it is likely that these factors may alter the influences of ENSO on dust activities.”

36 1.2 (2) In Tables S1, a total of 12 global climate models (GCMs) from the Coupled Model  
37 Intercomparison Project Phase 6 (CMIP6) are selected to estimate the influences of ENSO  
38 on dust deposition. However, I cannot find the criteria for selecting these GCMs which are  
39 generally required for a scientifically sound paper. In addition, three models and one model  
40 in Table S2 cannot provide the od550dust and emidust, respectively. Why were these models  
41 kept instead of eliminating them?

42 **Response:** We thank the reviewer for raising this point. We selected all the models with accessible  
43 dust deposition data. Considering the total models is somewhat low (i.e., 12 models), we kept all  
44 these models. To our knowledge, dry and wet deposition of dust are key variables which directly  
45 affect local environment, thus we selected all models having these data.

46 We add the following sentences to Section 2.1 to clarify this point:

47 “We limited our study to all the models having both dry dust and wet dust data (i.e., there is total  
48 of 12 models with accessible dry dust and wet dust data as described in Table S2). Dust deposition  
49 on land and ocean surface are important metrics to assess the impacts of dust activities on  
50 ecosystems and environment (Bao et al., 2017; Fan et al., 2006; Jickells et al., 2005; Jiménez et  
51 al., 2018; Kanakidou et al., 2018; Schulz et al., 2012). Additional data of od550dust and emidust  
52 supplied by these 12 models provide further understanding of ENSO impacts on dust activities.”

53 1.3 (3) In the Discussion part, the authors listed the possible reasons for the influences of ENSO  
54 on the dust deposition. In my opinion, ENSO also plays significant role in modulating the  
55 atmospheric circulation patterns that could substantially affect the spatial pattern of dust  
56 deposition. I think that it will be very interesting if the authors could discuss some impacts  
57 of atmospheric circulation patterns induced by ENSO on the dust deposition and  
58 transportation.

59 **Response:** We thank the reviewer for this suggestion. We added the following sentences to the  
60 Section 4 Discussion as below:

61 “As dust particles might be carried by winds between different regions (Guo et al., 2017; Yang et  
62 al., 2017), the influences of ENSO on global atmospheric circulation and rainfall (Yeh et al., 2018)  
63 lead to ENSO-induced changes in spatial pattern of dust deposition. For example, ENSO impacts  
64 on winds and precipitation over the tropical Pacific (Dai and Wigley, 2000; Le and Bae, 2020)  
65 contribute to the causal effects of ENSO on dry and wet dust deposition over this region (Figure  
66 1). In addition, ENSO atmospheric teleconnections over Australia, North and South Americas  
67 (Ashok et al., 2007; Garfinkel et al., 2013; Taschetto and England, 2009; Yu and Zou, 2013) play  
68 an important role on dust deposition in these regions (Figure 1).”

69 1.4 (4) The two paragraphs in the section of Methods have only one sentence, I thus suggest the  
70 authors to combine them into one paragraph.

71 **Response:** We thank the reviewer for this suggestion. These two paragraphs are reorganized. In  
72 addition, we moved part of the supplementary to Section 2.2 to further clarify the Methods used  
73 in this study:

74 “We use the following multivariate predictive model (Mosedale et al., 2006; Stern and Kaufmann,  
75 2013) to estimate the causal links between the ENSO and dust deposition:

$$76 X_t = \sum_{i=1}^p \alpha_i X_{t-i} + \sum_{i=1}^p \beta_i Y_{t-i} + \sum_{j=1}^m \sum_{i=1}^p \delta_{j,i} Z_{j,t-i} + \varepsilon_t \quad (1)$$

77 where  $X_t$  is the annual mean (or seasonal mean) dust deposition for year  $t$ ,  $Y_t$  is the ENSO index,  
78 and  $Z_{j,t}$  is the confounding factor  $j$  for year  $t$ . In the predictive model presented in equation 1, while  
79 assessing the effect of  $Y$  on  $X$  (i.e., the contribution of the term  $\sum_{i=1}^p \beta_i Y_{t-i}$  in predicting  $X$ ), the  
80 possible influence of past  $X$  events are considered by adding the term  $\sum_{i=1}^p \alpha_i X_{t-i}$ . Thus, the causal  
81 influence of  $Y$  on  $X$ , if detected, is robust and the impact of past  $X$  events are accounted in the  
82 analyses. Here,  $m$  is the number of confounding factors and  $p \geq 1$  is the order of the multivariate  
83 predictive model. The optimal order  $p$  is computed by minimizing the Schwarz criterion or the  
84 Bayesian information criterion (Schwarz, 1978). The optimal orders may be different for each  
85 model.

86 Here we take into account the impacts of confounding factors and therefore provide further  
87 information of the real-world teleconnections. In the analyses, we use three different confounding  
88 factors; hence,  $m$  is equal to 3. The noise residuals  $\varepsilon_t$  and the regression coefficients  $\alpha_i$ ,  $\beta_i$  and  $\delta_{j,i}$

89 are computed by using the multiple linear regression analysis of the least squares method. We  
90 detrend and normalize all the climate indices.”

91 Specific comments:

92 1.5 L24: “feedback” can be revised to “feed back”

93 **Response:** We thank the reviewer for pointing this out. We corrected to “have impacts” to avoid  
94 confusing the readers.

95 1.6 L32: Some important references can be cited here to strengthen the statement concerning the  
96 role of dust on environment, including <https://doi.org/10.1029/97JD00260>;  
97 <https://doi.org/10.1016/j.atmosenv.2017.07.036>; <https://doi.org/10.1029/2019JD030758>

98 **Response:** We thank the reviewer for this suggestion. We included these references to line 32 and  
99 other places in the Introduction:

100 “...and environments (Guo et al., 2017; Li et al., 2019; Perry et al., 1997; Xu et al., 2017; Zhang  
101 et al., 2018).”

102 1.7 L40: “earth” -> “Earth”

103 **Response:** We corrected as your suggestion.

104 1.8 L46-47: what is the difference

105 **Response:** We thank the reviewer for raising this point. We further clarify the role of other modes  
106 on the linkage between ENSO and global dust activities in Section 2.2 as below:

107 “In the analyses, we investigated the confounding effects of other main climate modes (i.e., the  
108 SAM (e.g., Cai et al., 2011), the IOD (Saji et al., 1999; Webster et al., 1999), and the NAO (Hurrell  
109 et al., 2003)) on the links of ENSO and dust activities. The climate modes SAM, the IOD and the  
110 NAO are the important sources of global climate variability (Hurrell et al., 2003; Luo et al., 2012;  
111 Roxy et al., 2015). For instance, the NAO is the prominent mode of atmospheric circulation  
112 variability over the North Atlantic and surrounding regions (Delworth et al., 2016; Hurrell et al.,  
113 2003) and variations in NAO are crucial for the environment and society (Hurrell et al., 2003). The  
114 IOD affects climate extremes over the Indian Ocean and surrounding areas (Abram et al., 2008;  
115 Kripalani et al., 2009; Kripalani and Kulkarni, 1997) and might cause severe economic  
116 consequences (Ummenhofer et al., 2009). The SAM is the major mode of atmospheric circulation

117 variability in the southern Hemisphere (Cai et al., 2011; Raphael and Holland, 2006). In addition,  
118 changes in these modes may affect the variations of ENSO (Abram et al., 2020; Cai et al., 2011,  
119 2019; Le et al., 2020; Le and Bae, 2019). Nevertheless, it is likely that these factors may alter the  
120 influences of ENSO on dust activities.”

121 1.9 L116: “original”-> “originated”

122 **Response:** We corrected as your suggestion.

123 1.10 Lines 44-46 of the Supplement, this paragraph only has one sentence. I suggest the authors  
124 to combine Lines 44-51 into one paragraph.

125 **Response:** We combined the lines 44-51 (Supplement) into one paragraph as your suggestion.

## 126 **References**

127 Abram, N. J., Gagan, M. K., Cole, J. E., Hantoro, W. S. and Mudelsee, M.: Recent intensification  
128 of tropical climate variability in the Indian Ocean, *Nat. Geosci.*, 1(12), 849–853,  
129 doi:10.1038/ngeo357, 2008.

130 Abram, N. J., Wright, N. M., Ellis, B., Dixon, B. C., Wurtzel, J. B., England, M. H., Ummenhofer,  
131 C. C., Philibosian, B., Cahyarini, S. Y., Yu, T.-L., Shen, C.-C., Cheng, H., Edwards, R. L. and  
132 Heslop, D.: Coupling of Indo-Pacific climate variability over the last millennium, *Nature*,  
133 579(7799), 385–392, doi:10.1038/s41586-020-2084-4, 2020.

134 Ashok, K., Behera, S. K., Rao, S. A., Weng, H. and Yamagata, T.: El Niño Modoki and its possible  
135 teleconnection, *J. Geophys. Res. Ocean.*, 112(11), 1–27, doi:10.1029/2006JC003798, 2007.

136 Bao, H., Niggemann, J., Luo, L., Dittmar, T. and Kao, S. J.: Aerosols as a source of dissolved  
137 black carbon to the ocean, *Nat. Commun.*, 8(1), doi:10.1038/s41467-017-00437-3, 2017.

138 Cai, W., Sullivan, A. and Cowan, T.: Interactions of ENSO, the IOD, and the SAM in CMIP3  
139 Models, *J. Clim.*, 24(6), 1688–1704, doi:10.1175/2010JCLI3744.1, 2011.

140 Cai, W., Wu, L., Lengaigne, M., Li, T., McGregor, S., Kug, J.-S., Yu, J.-Y., Stuecker, M. F.,  
141 Santoso, A., Li, X., Ham, Y.-G., Chikamoto, Y., Ng, B., McPhaden, M. J., Du, Y., Dommenges,  
142 D., Jia, F., Kajtar, J. B., Keenlyside, N., Lin, X., Luo, J.-J., Martín-Rey, M., Ruprich-Robert, Y.,  
143 Wang, G., Xie, S.-P., Yang, Y., Kang, S. M., Choi, J.-Y., Gan, B., Kim, G.-I., Kim, C.-E., Kim,  
144 S., Kim, J.-H. and Chang, P.: Pantropical climate interactions, *Science* (80-. ), 363(6430),  
145 eaav4236, doi:10.1126/science.aav4236, 2019.

146 Dai, A. and Wigley, T. M. L.: Global patterns of ENSO-induced precipitation, *Geophys. Res. Lett.*,  
147 27(9), 1283–1286, doi:10.1029/1999GL011140, 2000.

148 Delworth, T. L., Zeng, F., Vecchi, G. A., Yang, X., Zhang, L. and Zhang, R.: The North Atlantic  
149 Oscillation as a driver of rapid climate change in the Northern Hemisphere, *Nat. Geosci.*, 9(7),  
150 509–512, doi:10.1038/ngeo2738, 2016.

151 Fan, S. M., Moxim, W. J. and Levy, H.: Aeolian input of bioavailable iron to the ocean, *Geophys.*  
152 *Res. Lett.*, 33(7), 2–5, doi:10.1029/2005GL024852, 2006.

153 Garfinkel, C. I., Hurwitz, M. M., Waugh, D. W. and Butler, A. H.: Are the teleconnections of  
154 Central Pacific and Eastern Pacific El Niño distinct in boreal wintertime?, *Clim. Dyn.*, 41(7–8),  
155 1835–1852, doi:10.1007/s00382-012-1570-2, 2013.

156 Guo, J., Lou, M., Miao, Y., Wang, Y., Zeng, Z., Liu, H., He, J., Xu, H., Wang, F., Min, M. and  
157 Zhai, P.: Trans-Pacific transport of dust aerosols from East Asia: Insights gained from multiple  
158 observations and modeling, *Environ. Pollut.*, 230, 1030–1039, doi:10.1016/j.envpol.2017.07.062,  
159 2017.

160 Hurrell, J. W., Kushnir, Y., Ottersen, G. and Visbeck, M.: An overview of the North Atlantic  
161 Oscillation, in *Geophysical Monograph American Geophysical Union*, pp. 1–35, American  
162 Geophysical Union., 2003.

163 Jickells, T. D., An, Z. S., Andersen, K. K., Baker, A. R., Bergametti, C., Brooks, N., Cao, J. J.,  
164 Boyd, P. W., Duce, R. A., Hunter, K. A., Kawahata, H., Kubilay, N., LaRoche, J., Liss, P. S.,  
165 Mahowald, N., Prospero, J. M., Ridgwell, A. J., Tegen, I. and Torres, R.: Global iron connections  
166 between desert dust, ocean biogeochemistry, and climate, *Science (80-. )*, 308(5718), 67–71,  
167 doi:10.1126/science.1105959, 2005.

168 Jiménez, L., Rühland, K. M., Jeziorski, A., Smol, J. P. and Pérez-Martínez, C.: Climate change  
169 and Saharan dust drive recent cladoceran and primary production changes in remote alpine lakes  
170 of Sierra Nevada, Spain, *Glob. Chang. Biol.*, 24(1), e139–e158, doi:10.1111/gcb.13878, 2018.

171 Kanakidou, M., Myriokefalitakis, S. and Tsigaridis, K.: Aerosols in atmospheric chemistry and  
172 biogeochemical cycles of nutrients, *Environ. Res. Lett.*, 13(6), doi:10.1088/1748-9326/aabdb,  
173 2018.

174 Kripalani, R. H. and Kulkarni, A.: Rainfall variability over South-East Asia - Connections with  
175 Indian monsoon and Enso extremes: New perspectives, *Int. J. Climatol.*, 17(11), 1155–1168,  
176 doi:10.1002/(SICI)1097-0088(199709)17:11<1155::AID-JOC188>3.0.CO;2-B, 1997.

177 Kripalani, R. H., Oh, J. H. and Chaudhari, H. S.: Delayed influence of the Indian Ocean Dipole  
178 mode on the East Asia-West Pacific monsoon: possible mechanism, *Int. J. Climatol.*, 30(2), 197–  
179 209, doi:10.1002/joc.1890, 2009.

180 Le, T. and Bae, D.-H.: Response of global evaporation to major climate modes in historical and  
181 future Coupled Model Intercomparison Project Phase 5 simulations, *Hydrol. Earth Syst. Sci.*,  
182 24(3), 1131–1143, doi:10.5194/hess-24-1131-2020, 2020.

183 Le, T. and Bae, D.-H. H.: Causal links on interannual timescale between ENSO and the IOD in  
184 CMIP5 future simulations, *Geophys. Res. Lett.*, 46(5), 1–9, doi:10.1029/2018GL081633, 2019.

185 Le, T., Ha, K.-J. J., Bae, D.-H. H. and Kim, S.-H. H.: Causal effects of Indian Ocean Dipole on El  
186 Niño-Southern Oscillation during 1950-2014 based on high-resolution models and reanalysis data,  
187 *Environ. Res. Lett.*, 15(10), 1040b6, doi:10.1088/1748-9326/abb96d, 2020.

188 Li, Z., Wang, Y., Guo, J., Zhao, C., Cribb, M. C., Dong, X., Fan, J., Gong, D., Huang, J., Jiang,  
189 M., Jiang, Y., Lee, S. S., Li, H., Li, J., Liu, J., Qian, Y., Rosenfeld, D., Shan, S., Sun, Y., Wang,  
190 H., Xin, J., Yan, X., Yang, X., Yang, X. qun, Zhang, F. and Zheng, Y.: East Asian Study of  
191 Tropospheric Aerosols and their Impact on Regional Clouds, Precipitation, and Climate (EAST-  
192 AIRCPC), *J. Geophys. Res. Atmos.*, 124(23), 13026–13054, doi:10.1029/2019JD030758, 2019.

193 Luo, J.-J., Sasaki, W. and Masumoto, Y.: Indian Ocean warming modulates Pacific climate  
194 change, *Proc. Natl. Acad. Sci.*, 109(46), 18701–18706, doi:10.1073/pnas.1210239109, 2012.

195 Mosedale, T. J., Stephenson, D. B., Collins, M. and Mills, T. C.: Granger Causality of Coupled  
196 Climate Processes: Ocean Feedback on the North Atlantic Oscillation, *J. Clim.*, 19(7), 1182–1194,  
197 doi:10.1175/JCLI3653.1, 2006.

198 Perry, K. D., Cahill, T. A., Eldred, R. A., Dutcher, D. D. and Gill, T. E.: Long-range transport of  
199 North African dust to the eastern United States, *J. Geophys. Res. Atmos.*, 102(D10), 11225–11238,  
200 doi:10.1029/97JD00260, 1997.

201 Raphael, M. N. and Holland, M. M.: Twentieth century simulation of the southern hemisphere  
202 climate in coupled models. Part 1: Large scale circulation variability, *Clim. Dyn.*, 26(2–3), 217–  
203 228, doi:10.1007/s00382-005-0082-8, 2006.

204 Roxy, M. K., Ritika, K., Terray, P., Murtugudde, R., Ashok, K. and Goswami, B. N.: Drying of  
205 Indian subcontinent by rapid Indian ocean warming and a weakening land-sea thermal gradient,  
206 *Nat. Commun.*, 6(May), 7423, doi:10.1038/ncomms8423, 2015.

207 Saji, N. H., Goswami, B. N., Vinayachandran, P. N. and Yamagata, T.: A dipole mode in the

208 tropical Indian Ocean, *Nature*, 401(6751), 360–363, doi:10.1038/43854, 1999.

209 Schulz, M., Prospero, J. M., Baker, A. R., Dentener, F., Ickes, L., Liss, P. S., Mahowald, N. M.,  
210 Nickovic, S., García-Pando, C. P., Rodríguez, S., Sarin, M., Tegen, I. and Duce, R. A.:  
211 Atmospheric transport and deposition of mineral dust to the ocean: Implications for research needs,  
212 *Environ. Sci. Technol.*, 46(19), 10390–10404, doi:10.1021/es300073u, 2012.

213 Schwarz, G.: Estimating the dimension of a model, *Ann. Stat.* [online] Available from:  
214 <http://projecteuclid.org/euclid.aos/1176344136> (Accessed 30 May 2014), 1978.

215 Stern, D. I. and Kaufmann, R. K.: Anthropogenic and natural causes of climate change, *Clim.*  
216 *Change*, 122(1–2), 257–269, doi:10.1007/s10584-013-1007-x, 2013.

217 Taschetto, A. S. and England, M. H.: El Niño Modoki impacts on Australian rainfall, *J. Clim.*,  
218 22(11), 3167–3174, doi:10.1175/2008JCLI2589.1, 2009.

219 Ummenhofer, C. C., England, M. H., McIntosh, P. C., Meyers, G. A., Pook, M. J., Risbey, J. S.,  
220 Sen Gupta, A. and Taschetto, A. S.: What causes southeast Australia’s worst droughts?, *Geophys.*  
221 *Res. Lett.*, 36(4), L04706, doi:10.1029/2008GL036801, 2009.

222 Webster, P. J., Moore, A. M., Loschnigg, J. P. and Leben, R. R.: Coupled ocean–atmosphere  
223 dynamics in the Indian Ocean during 1997–98, *Nature*, 401(6751), 356–360, doi:10.1038/43848,  
224 1999.

225 Xu, H., Guo, J., Wang, Y., Zhao, C., Zhang, Z., Min, M., Miao, Y., Liu, H., He, J., Zhou, S. and  
226 Zhai, P.: Warming effect of dust aerosols modulated by overlapping clouds below, *Atmos.*  
227 *Environ.*, 166, 393–402, doi:10.1016/j.atmosenv.2017.07.036, 2017.

228 Yang, Y., Russell, L. M., Lou, S., Liao, H., Guo, J., Liu, Y., Singh, B. and Ghan, S. J.: Dust-wind  
229 interactions can intensify aerosol pollution over eastern China, *Nat. Commun.*, 8(May), 1–8,  
230 doi:10.1038/ncomms15333, 2017.

231 Yeh, S. W., Cai, W., Min, S. K., McPhaden, M. J., Dommenges, D., Dewitte, B., Collins, M.,  
232 Ashok, K., An, S. Il, Yim, B. Y. and Kug, J. S.: ENSO Atmospheric Teleconnections and Their  
233 Response to Greenhouse Gas Forcing, *Rev. Geophys.*, 56(1), 185–206,  
234 doi:10.1002/2017RG000568, 2018.

235 Yu, J. Y. and Zou, Y.: The enhanced drying effect of Central-Pacific El Niño on US winter,  
236 *Environ. Res. Lett.*, 8(1), doi:10.1088/1748-9326/8/1/014019, 2013.

237 Zhang, X.-X., Sharratt, B., Liu, L.-Y., Wang, Z.-F., Pan, X.-L., Lei, J.-Q., Wu, S.-X., Huang, S.-  
238 Y., Guo, Y.-H., Li, J., Tang, X., Yang, T., Tian, Y., Chen, X.-S., Hao, J.-Q., Zheng, H.-T., Yang,



239 Y.-Y. and Lyu, Y.-L.: East Asian dust storm in May 2017: observations, modelling, and its  
240 influence on the Asia-Pacific region, *Atmos. Chem. Phys.*, 18(11), 8353–8371, doi:10.5194/acp-  
241 18-8353-2018, 2018.  
242
