# Supplementary material for: Causal influences of El Niño–Southern Oscillation on global dust activities
Source: Copernicus journal article supplement (doi:10.5194/acp-2021-1055), 2022-02-07
Supplement: Supplementary file [file acp-2021-1055-AC2-supplement.pdf]

1

## 2 **2 Response to Reviewer #2's comments**

3 This paper aims to investigate the effect of ENSO on global dust emissions, concentration, and  
4 deposition. A multivariate predictive model and the Ganger causality test were used to analyze  
5 dust-relevant output from 12 CMIP6 models.

### 6 General Comments

7 A major and critical shortcoming of this paper, in current form, is the lack of detailed presentation  
8 of methodology, results, and discussion. The paper seems to be written hastily.

9 **Response:** We thank the reviewer for your comments. We agree with the reviewer that some parts  
10 of the manuscript need improvement. We modified the manuscript based on your suggestions as  
11 below.

12 2.1 Methodology: Authors only provide a few lines about their approach, and refer readers to  
13 their previous works and the supplementary document. However, a brief description of the  
14 method should be presented in this section.

15 **Response:** We thank the reviewer for raising this point. We moved part of the supplementary to  
16 Section 2.2 to further clarify the Methods used in this study as follows:

17 “We use the following multivariate predictive model (Mosedale et al., 2006; Stern and Kaufmann,  
18 2013) to estimate the causal links between the ENSO and dust deposition:

$$19 \mathbf{X}_t = \sum_{i=1}^p \alpha_i \mathbf{X}_{t-i} + \sum_{i=1}^p \beta_i \mathbf{Y}_{t-i} + \sum_{j=1}^m \sum_{i=1}^p \delta_{j,i} \mathbf{Z}_{j,t-i} + \boldsymbol{\varepsilon}_t \quad (1)$$

20 where  $X_t$  is the annual mean (or seasonal mean) dust deposition for year  $t$ ,  $Y_t$  is the ENSO index,  
21 and  $Z_{j,t}$  is the confounding factor  $j$  for year  $t$ . In the predictive model presented in equation 1, while  
22 assessing the effect of  $Y$  on  $X$  (i.e., the contribution of the term  $\sum_{i=1}^p \beta_i Y_{t-i}$  in predicting  $X$ ), the  
23 possible influence of past  $X$  events are considered by adding the term  $\sum_{i=1}^p \alpha_i X_{t-i}$ . Thus, the causal  
24 influence of  $Y$  on  $X$ , if detected, is robust and the impact of past  $X$  events are accounted in the  
25 analyses. Here,  $m$  is the number of confounding factors and  $p \geq 1$  is the order of the multivariate  
26 predictive model. The optimal order  $p$  is computed by minimizing the Schwarz criterion or the  
27 Bayesian information criterion (Schwarz, 1978). The optimal orders may be different for each  
28 model.

29 Here we take into account the impacts of confounding factors and therefore provide further  
30 information of the real-world teleconnections. In the analyses, we use three different confounding  
31 factors; hence,  $m$  is equal to 3. The noise residuals  $\varepsilon_t$  and the regression coefficients  $\alpha_i$ ,  $\beta_i$  and  $\delta_{j,i}$   
32 are computed by using the multiple linear regression analysis of the least squares method. We  
33 detrend and normalize all the climate indices.”

34 2.2 Additionally, authors stated that they studied confounding effects of other climates modes,  
35 namely NAO, SAM, and IOD. First, what is the basis for choosing these modes(?), and  
36 second, no analysis or sensitivity test regarding this treatment was provided.

37 **Response:** We thank the reviewer for raising this point. We added the following sentences to  
38 Section 2.2 to explain the selection of the three factors Indian Ocean Dipole, Southern Annular  
39 Mode, and the North Atlantic Oscillation:

40 “The climate modes SAM, the IOD and the NAO are the important sources of global climate  
41 variability (Hurrell et al., 2003; Luo et al., 2012; Roxy et al., 2015). For instance, the NAO is the  
42 prominent mode of atmospheric circulation variability over the North Atlantic and surrounding  
43 regions (Delworth et al., 2016; Hurrell et al., 2003) and variations in NAO are crucial for the  
44 environment and society (Hurrell et al., 2003). The IOD affects climate extremes over the Indian  
45 Ocean and surrounding areas (Abram et al., 2008; Kripalani et al., 2009; Kripalani and Kulkarni,  
46 1997) and might cause severe economic consequences (Ummenhofer et al., 2009). The SAM is  
47 the major mode of atmospheric circulation variability in the southern Hemisphere (Cai et al., 2011;  
48 Raphael and Holland, 2006). In addition, changes in these modes may affect the variations of  
49 ENSO (Abram et al., 2020; Cai et al., 2011, 2019; Le et al., 2020; Le and Bae, 2019). Nevertheless,  
50 it is likely that these factors may alter the influences of ENSO on dust activities.”

51 2.3 Finally, what is the basis for choosing these 12 models as data crucial for these analyses are  
52 missing in three of them (table S2)?

53 **Response:** We thank the reviewer for raising this point. We selected all the models with accessible  
54 dust-related data. Considering the total models is somewhat low (i.e., 12 models), we kept all these  
55 models. To our knowledge, dry and wet deposition of dust are key variables which directly affect  
56 local environment, thus we selected all models having these data.

57 We add the following sentences to Section 2.1 to clarify this point:

58 “We limited our study to all the models having both dry dust and wet dust data (i.e., there is total  
59 of 12 models with accessible dry dust and wet dust data as described in Table S2). Dust deposition  
60 on land and ocean surface are important metrics to assess the impacts of dust activities on  
61 ecosystems and environment (Bao et al., 2017; Fan et al., 2006; Jickells et al., 2005; Jiménez et  
62 al., 2018; Kanakidou et al., 2018; Schulz et al., 2012). Additional data of od550dust and emidust  
63 supplied by these 12 models provide further understanding of ENSO impacts on dust activities.”

64 2.4 Results and Discussion: Results were presented and discussed in a highly qualitative manner  
65 without any in-depth analysis as required in a manuscript with an archival value. Authors  
66 only reported the fraction of total “affected area” over ocean and land, but this number alone  
67 is not useful in understanding the true impact of ENSO on dust activities in different regions  
68 of the globe.

69 **Response:** We thank the reviewer for raising this point. The “affected area” provide important  
70 information on the scale of ENSO impacts. The purpose of this work is to provide simple and  
71 robust conclusions about the causal effects of ENSO on global dust activities. To our knowledge,  
72 these analyses are lacking, and the results described here have not been shown before. We should  
73 note that we also provided information on the impacts of ENSO on dust activities at regional scale,  
74 as well as the consistency between models in simulating the connection between ENSO and dust  
75 activities.

76 2.5 As expected, individual models show drastically different results (figures 4-6), but  
77 conclusions of the paper were based only on the ensemble mean results with minimal  
78 discussion about the difference between models. Note that the chosen models use different  
79 dust emissions and deposition, as well as dust size partitioning schemes, so ensemble mean  
80 results must be interpreted with caution.

81 **Response:** We thank the reviewer for raising this point. The use of ensemble mean is widely used  
82 and is expected to reduce the uncertainty related to the connection between ENSO and dust  
83 activities. In fact, despite using different aerosol model, there is high agreement (i.e., denoted by  
84 stippling in Figures 1 and 2) between models for the results. Our conclusions are mainly based on  
85 this high consistency.

86 We partly discussed the difference between models in Section 4 as below:

87 “Regarding the consistency across models, the response of dust emission to ENSO is much  
88 stronger in the models INM-CM5-0, MIROC-ES2L, and UKESM1\_0\_LL compared to other  
89 models (Figure 6). This difference might be due to the use of different dust schemes and soil  
90 properties in this model which lead to higher dust emissions (Mulcahy et al., 2020; Zhao et al.,  
91 2022). As models use different parameters to estimate dust emissions (Thornhill et al., 2020), this  
92 discrepancy leads to low consensus across models in modeling the response of dust emissions to  
93 ENSO (Figures 3 and 6).”

94 2.6 Finally, several conclusions of the work are not supported by the current results, for example,  
95 “ENSO may initiate dust activities in .... (line 93)”, “dust deposited in the South Pacific and  
96 the Southern Ocean might be originated from central Australia and southern South America  
97 (line 117)”, “weak causal impacts of ENSO on regional dust emissions of major dust sources  
98 (Figure 3) may indicate the important role of human influences in igniting local dust  
99 activities... (line 132)”.

100 **Response:** We thank the reviewer for raising this point. We removed the lines 93 and 117 to avoid  
101 confusing the readers.

102 We rewrote line 132 as this line serves as a discussion rather than a conclusion as below:

103 “Substantial influences of ENSO on dust emission over central Australia (Figure 3) suggest an  
104 agreement with earlier work (Marx et al., 2009), while we observe weak causal impacts of ENSO  
105 on regional dust emissions of major dust sources (Figure 3).”

106 “Previous studies indicate the important role of human influences in igniting local dust activities  
107 (Duniway et al., 2019; Webb and Pierre, 2018).”

## 108 Specific Comments

109 2.7 Line 15 and all other places through the manuscript: Caution must be practiced with the term  
110 “concentration” as the relationship between dust concentration and dust AOD depends on  
111 the pre-defined and assumed dust particle size distribution, which is different in different  
112 models.

113 **Response:** We thank the reviewer for raising this point. We removed the term “concentration” to  
114 avoid confusing the readers.

115 2.8 Line 15 and all other places through the manuscript: Change “transportation” to “transport”

116 **Response:** We thank the reviewer for raising this point. We corrected as your suggestion.

117 2.9 Line 57: “Dry and wet deposition is related to different types of dust and aerosol.” Not clear  
118 what authors mean here.

119 **Response:** We thank the reviewer for raising this point. We removed this sentence to avoid  
120 confusing the readers.

121 2.10 Line 82: How are “areas affected by ENSO” defined? What are the criteria considered?

122 **Response:** We thank the reviewer for raising this point. We added the following sentence to clarify  
123 the criteria for computing the areas affected by ENSO:  
124 “In Figure 2b, the areas influenced by ENSO are computed as the areas limited by the cyan contour  
125 line as shown in Figures 1 and 2a (i.e.,  $p$ -value is lower than 0.33 or ENSO is unlikely to exhibit  
126 no causal effects on dust activities over these regions).”

127 2.11 Line 116: Change “original” to “originated”

128 **Response:** We corrected as your suggestion.

129 2.12 Figure 1: What is the significance of studying dry and wet deposition separately in figure 1,  
130 as paper provides no insightful comparison between the two?

131 **Response:** We thank the reviewer for raising this point. As we introduced in Section 2.1, dry and  
132 wet deposition are related to different processes of dust deposition. Hence, direct comparison is  
133 not necessary. We combined the results in 1 Figure as these dust deposition processes are  
134 complementing for each other.

135 2.13 Figure 2(b) and S2: There two figures don’t provide any addition information beyond just  
136 one number mentioned in the text, so they should be removed.

137 **Response:** We thank the reviewer for raising this point. We think these Figures provide quick  
138 summary and illustration for the Text. Hence, we would like to keep these Figures.

139 2.14 Table S1 and S2: Should be merged into one table

140 **Response:** We thank the reviewer for this suggestion. We would like to keep these Tables  
141 separately to avoid a too big Table. It would make the presentation easier.

142 2.15 The following recent publication might be of interest to the authors:  
143 <https://acp.copernicus.org/articles/22/2095/2022/>

144 **Response:** We thank the reviewer for this suggestion. We include this publication as a reference.

## 145 **References**

146 Abram, N. J., Gagan, M. K., Cole, J. E., Hantoro, W. S. and Mudelsee, M.: Recent intensification  
147 of tropical climate variability in the Indian Ocean, *Nat. Geosci.*, 1(12), 849–853,  
148 doi:10.1038/ngeo357, 2008.

149 Abram, N. J., Wright, N. M., Ellis, B., Dixon, B. C., Wurtzel, J. B., England, M. H., Ummenhofer,  
150 C. C., Philibosian, B., Cahyarini, S. Y., Yu, T.-L., Shen, C.-C., Cheng, H., Edwards, R. L. and  
151 Heslop, D.: Coupling of Indo-Pacific climate variability over the last millennium, *Nature*,  
152 579(7799), 385–392, doi:10.1038/s41586-020-2084-4, 2020.

153 Bao, H., Niggemann, J., Luo, L., Dittmar, T. and Kao, S. J.: Aerosols as a source of dissolved  
154 black carbon to the ocean, *Nat. Commun.*, 8(1), doi:10.1038/s41467-017-00437-3, 2017.

155 Cai, W., Sullivan, A. and Cowan, T.: Interactions of ENSO, the IOD, and the SAM in CMIP3  
156 Models, *J. Clim.*, 24(6), 1688–1704, doi:10.1175/2010JCLI3744.1, 2011.

157 Cai, W., Wu, L., Lengaigne, M., Li, T., McGregor, S., Kug, J.-S., Yu, J.-Y., Stuecker, M. F.,  
158 Santoso, A., Li, X., Ham, Y.-G., Chikamoto, Y., Ng, B., McPhaden, M. J., Du, Y., Dommenges,  
159 D., Jia, F., Kajtar, J. B., Keenlyside, N., Lin, X., Luo, J.-J., Martín-Rey, M., Ruprich-Robert, Y.,  
160 Wang, G., Xie, S.-P., Yang, Y., Kang, S. M., Choi, J.-Y., Gan, B., Kim, G.-I., Kim, C.-E., Kim,  
161 S., Kim, J.-H. and Chang, P.: Pantropical climate interactions, *Science* (80-. ), 363(6430),  
162 eaav4236, doi:10.1126/science.aav4236, 2019.

163 Delworth, T. L., Zeng, F., Vecchi, G. A., Yang, X., Zhang, L. and Zhang, R.: The North Atlantic  
164 Oscillation as a driver of rapid climate change in the Northern Hemisphere, *Nat. Geosci.*, 9(7),  
165 509–512, doi:10.1038/ngeo2738, 2016.

166 Duniway, M. C., Pfennigwerth, A. A., Fick, S. E., Nauman, T. W., Belnap, J. and Barger, N. N.:  
167 Wind erosion and dust from US drylands: a review of causes, consequences, and solutions in a  
168 changing world, *Ecosphere*, 10(3), doi:10.1002/ecs2.2650, 2019.

169 Fan, S. M., Moxim, W. J. and Levy, H.: Aeolian input of bioavailable iron to the ocean, *Geophys.*  
170 *Res. Lett.*, 33(7), 2–5, doi:10.1029/2005GL024852, 2006.

171 Hurrell, J. W., Kushnir, Y., Ottersen, G. and Visbeck, M.: An overview of the North Atlantic  
172 Oscillation, in *Geophysical Monograph American Geophysical Union*, pp. 1–35, American  
173 Geophysical Union., 2003.

174 Jickells, T. D., An, Z. S., Andersen, K. K., Baker, A. R., Bergametti, C., Brooks, N., Cao, J. J.,  
175 Boyd, P. W., Duce, R. A., Hunter, K. A., Kawahata, H., Kubilay, N., LaRoche, J., Liss, P. S.,  
176 Mahowald, N., Prospero, J. M., Ridgwell, A. J., Tegen, I. and Torres, R.: Global iron connections  
177 between desert dust, ocean biogeochemistry, and climate, *Science* (80-. ), 308(5718), 67–71,  
178 doi:10.1126/science.1105959, 2005.

179 Jiménez, L., Rühland, K. M., Jeziorski, A., Smol, J. P. and Pérez-Martínez, C.: Climate change  
180 and Saharan dust drive recent cladoceran and primary production changes in remote alpine lakes  
181 of Sierra Nevada, Spain, *Glob. Chang. Biol.*, 24(1), e139–e158, doi:10.1111/gcb.13878, 2018.

182 Kanakidou, M., Myriokefalitakis, S. and Tsigaridis, K.: Aerosols in atmospheric chemistry and  
183 biogeochemical cycles of nutrients, *Environ. Res. Lett.*, 13(6), doi:10.1088/1748-9326/aabddb,  
184 2018.

185 Kripalani, R. H. and Kulkarni, A.: Rainfall variability over South-East Asia - Connections with  
186 Indian monsoon and Enso extremes: New perspectives, *Int. J. Climatol.*, 17(11), 1155–1168,  
187 doi:10.1002/(SICI)1097-0088(199709)17:11<1155::AID-JOC188>3.0.CO;2-B, 1997.

188 Kripalani, R. H., Oh, J. H. and Chaudhari, H. S.: Delayed influence of the Indian Ocean Dipole  
189 mode on the East Asia-West Pacific monsoon: possible mechanism, *Int. J. Climatol.*, 30(2), 197–  
190 209, doi:10.1002/joc.1890, 2009.

191 Le, T. and Bae, D.-H. H.: Causal links on interannual timescale between ENSO and the IOD in  
192 CMIP5 future simulations, *Geophys. Res. Lett.*, 46(5), 1–9, doi:10.1029/2018GL081633, 2019.

193 Le, T., Ha, K.-J. J., Bae, D.-H. H. and Kim, S.-H. H.: Causal effects of Indian Ocean Dipole on El  
194 Niño-Southern Oscillation during 1950-2014 based on high-resolution models and reanalysis data,  
195 *Environ. Res. Lett.*, 15(10), 1040b6, doi:10.1088/1748-9326/abb96d, 2020.

196 Luo, J.-J., Sasaki, W. and Masumoto, Y.: Indian Ocean warming modulates Pacific climate  
197 change, *Proc. Natl. Acad. Sci.*, 109(46), 18701–18706, doi:10.1073/pnas.1210239109, 2012.

198 Marx, S. K., McGowan, H. A. and Kamber, B. S.: Long-range dust transport from eastern  
199 Australia: A proxy for Holocene aridity and ENSO-type climate variability, *Earth Planet. Sci.*  
200 *Lett.*, 282(1–4), 167–177, doi:10.1016/j.epsl.2009.03.013, 2009.

201 Mosedale, T. J., Stephenson, D. B., Collins, M. and Mills, T. C.: Granger Causality of Coupled  
202 Climate Processes: Ocean Feedback on the North Atlantic Oscillation, *J. Clim.*, 19(7), 1182–1194,  
203 doi:10.1175/JCLI3653.1, 2006.

204 Mulcahy, J. P., Johnson, C., Jones, C. G., Povey, A. C., Scott, C. E., Sellar, A., Turnock, S. T.,

205 Woodhouse, M. T., Abraham, N. L., Andrews, M. B., Bellouin, N., Browse, J., Carslaw, K. S.,  
206 Dalvi, M., Folberth, G. A., Glover, M., Grosvenor, D. P., Hardacre, C., Hill, R., Johnson, B., Jones,  
207 A., Kipling, Z., Mann, G., Mollard, J., O'Connor, F. M., Palmiéri, J., Reddington, C., Rumbold,  
208 S. T., Richardson, M., Schutgens, N. A. J., Stier, P., Stringer, M., Tang, Y., Walton, J., Woodward,  
209 S. and Yool, A.: Description and evaluation of aerosol in UKESM1 and HadGEM3-GC3.1 CMIP6  
210 historical simulations, *Geosci. Model Dev.*, 13(12), 6383–6423, doi:10.5194/gmd-13-6383-2020,  
211 2020.

212 Raphael, M. N. and Holland, M. M.: Twentieth century simulation of the southern hemisphere  
213 climate in coupled models. Part 1: Large scale circulation variability, *Clim. Dyn.*, 26(2–3), 217–  
214 228, doi:10.1007/s00382-005-0082-8, 2006.

215 Roxy, M. K., Ritika, K., Terray, P., Murtugudde, R., Ashok, K. and Goswami, B. N.: Drying of  
216 Indian subcontinent by rapid Indian ocean warming and a weakening land-sea thermal gradient,  
217 *Nat. Commun.*, 6(May), 7423, doi:10.1038/ncomms8423, 2015.

218 Schulz, M., Prospero, J. M., Baker, A. R., Dentener, F., Ickes, L., Liss, P. S., Mahowald, N. M.,  
219 Nickovic, S., García-Pando, C. P., Rodríguez, S., Sarin, M., Tegen, I. and Duce, R. A.:  
220 Atmospheric transport and deposition of mineral dust to the ocean: Implications for research needs,  
221 *Environ. Sci. Technol.*, 46(19), 10390–10404, doi:10.1021/es300073u, 2012.

222 Schwarz, G.: Estimating the dimension of a model, *Ann. Stat.* [online] Available from:  
223 <http://projecteuclid.org/euclid.aos/1176344136> (Accessed 30 May 2014), 1978.

224 Stern, D. I. and Kaufmann, R. K.: Anthropogenic and natural causes of climate change, *Clim.*  
225 *Change*, 122(1–2), 257–269, doi:10.1007/s10584-013-1007-x, 2013.

226 Thornhill, G., Collins, W., Olivié, D., Archibald, A., Bauer, S., Checa-Garcia, R., Fiedler, S.,  
227 Folberth, G., Gjermundsen, A., Horowitz, L., Lamarque, J.-F., Michou, M., Mulcahy, J., Nabat,  
228 P., Naik, V., O'Connor, F., Paulot, F., Schulz, M., Scott, C., Seferian, R., Smith, C., Takemura,  
229 T., Tilmes, S. and Weber, J.: Climate-driven chemistry and aerosol feedbacks in CMIP6 Earth  
230 system models, *Atmos. Chem. Phys.*, 1–36, doi:10.5194/acp-2019-1207, 2020.

231 Ummenhofer, C. C., England, M. H., McIntosh, P. C., Meyers, G. A., Pook, M. J., Risbey, J. S.,  
232 Sen Gupta, A. and Taschetto, A. S.: What causes southeast Australia's worst droughts?, *Geophys.*  
233 *Res. Lett.*, 36(4), L04706, doi:10.1029/2008GL036801, 2009.

234 Webb, N. P. and Pierre, C.: Quantifying Anthropogenic Dust Emissions, *Earth's Futur.*, 6(2), 286–  
235 295, doi:10.1002/2017EF000766, 2018.



236 Zhao, A., Ryder, C. L. and Wilcox, L. J.: How well do the CMIP6 models simulate dust aerosols?,  
237 Atmos. Chem. Phys., 22(3), 2095–2119, doi:10.5194/acp-22-2095-2022, 2022.  
238
