# Supplementary material for: Causal influences of El Niño–Southern Oscillation on global dust activities
Source: Copernicus journal article supplement (doi:10.5194/acp-2021-1055), 2022-02-07
Supplement: Supplementary file [file acp-2021-1055-AC3-supplement.pdf]

1 **3 Response to Reviewer #3's comments**

2 The paper presents an analysis on the influence of the El Niño–Southern Oscillation (ENSO) on  
3 the global dust activities (emission, concentration and transportation and dry and wet deposition)  
4 based on CMIP6 historical simulations. The manuscript is structured and concise and the topic is  
5 of scientific interest, therefore I would encourage publication provided that the following point are  
6 addressed:

7 **Response:** We thank the reviewer for your comments. We modified the manuscript based on your  
8 suggestions as below.

9 **General comments:**

10 3.1 Among the key results that are emphasized by the manuscript (abstract included) there is the  
11 suggestion of the role of human activity in the intensity of dust emission as a consequence  
12 of a lack of clear causal impact of ENSO on dust availability. This point does not seem to  
13 be clearly explained, nor properly supported in the discussion. Also, it is not clear why is the  
14 human activity the only other possible factor considered when finding a weak role of ENSO  
15 in regional dust emissions over major dust sources.

16 **Response:** We thank the reviewer for raising this point. We agree that the role of human activity  
17 on global dust activities is not supported by the results of this manuscript. This discussion is only  
18 the inference of the main results as shown in Figures 3 and 6. We removed this conclusion in the  
19 abstract to avoid confusing the readers. We also rewrote this discussion in Section 4.

20 3.2 Lines 35-38 list a series of references mentioning studies who observed the ENSO influences  
21 on dust activities but only one of them is then compared with the results of the manuscript  
22 itself (Marx et al 2009) regarding the emission over Australia. The reader is left questioning  
23 if there is any other agreement/disagreement with the previous studies.

24 **Response:** We thank the reviewer for raising this point. We added the following sentences to  
25 Section 4 Discussion to further discuss our results in relation with previous works as below:

26 “The causal impacts of ENSO on dust deposition over South America (Figure 1) are consistent  
27 with previous studies (Boy and Wilcke, 2008; Shao et al., 2013). Figures 1 and 2 show an

28 agreement with recent works for the potential influences of ENSO on dust activities over regions  
29 from Arabian Peninsula to Central Asia (Huang et al., 2021) and East Asia (Jeong et al., 2018).”

30 3.3 The methodology section is way too brief and not explicative, totally referring to the text S1  
31 of the supplementary. I would encourage to better explain the methods and/or move part of  
32 the supplementary in this section.

33 **Response:** We thank the reviewer for this suggestion. We moved part of the supplementary to  
34 Section 2.2 as below:

35 “We use the following multivariate predictive model (Mosedale et al., 2006; Stern and Kaufmann,  
36 2013) to estimate the causal links between the ENSO and dust deposition:

$$37 X_t = \sum_{i=1}^p \alpha_i X_{t-i} + \sum_{i=1}^p \beta_i Y_{t-i} + \sum_{j=1}^m \sum_{i=1}^p \delta_{j,i} Z_{j,t-i} + \varepsilon_t \quad (1)$$

38 where  $X_t$  is the annual mean (or seasonal mean) dust deposition for year  $t$ ,  $Y_t$  is the ENSO index,  
39 and  $Z_{j,t}$  is the confounding factor  $j$  for year  $t$ . In the predictive model presented in equation 1, while  
40 assessing the effect of  $Y$  on  $X$  (i.e., the contribution of the term  $\sum_{i=1}^p \beta_i Y_{t-i}$  in predicting  $X$ ), the  
41 possible influence of past  $X$  events are considered by adding the term  $\sum_{i=1}^p \alpha_i X_{t-i}$ . Thus, the causal  
42 influence of  $Y$  on  $X$ , if detected, is robust and the impact of past  $X$  events are accounted in the  
43 analyses. Here,  $m$  is the number of confounding factors and  $p \geq 1$  is the order of the multivariate  
44 predictive model. The optimal order  $p$  is computed by minimizing the Schwarz criterion or the  
45 Bayesian information criterion (Schwarz, 1978). The optimal orders may be different for each  
46 model.

47 Here we take into account the impacts of confounding factors and therefore provide further  
48 information of the real-world teleconnections. In the analyses, we use three different confounding  
49 factors; hence,  $m$  is equal to 3. The noise residuals  $\varepsilon_t$  and the regression coefficients  $\alpha_i$ ,  $\beta_i$  and  $\delta_{j,i}$   
50 are computed by using the multiple linear regression analysis of the least squares method. We  
51 detrend and normalize all the climate indices.”

52 3.4 I was wondering also if there is any way to mention how significant is the ENSO variation  
53 on dust activities with respect to the total global dust activity, for example the AOD variation  
54 due to ENSO with respect to the global AOD average.

55 **Response:** We thank the reviewer for raising this point. We agree that we could compute the  
56 significance of ENSO impacts on global mean AOD. While this single indicator is useful, it is  
57 however too general and might confusing the readers as ENSO impacts are dependent on specific

58 region. In our opinion, the maps of ENSO impacts shown in Figure 2a might provide better  
59 illustration and details. For this reason, we have not tried to estimate the impacts of ENSO on  
60 global mean AOD.

61 **Specific comments:**

62 3.5 Lines 68-70: The authors mention the “confounding influence” of SAM, IOD and NAO but  
63 should explain at least briefly why and how those modes can be relevant on their study.

64 **Response:** We thank the reviewer for raising this point. We added the following sentences to  
65 Section 2.2 to explain the selection of the three factors Indian Ocean Dipole, Southern Annular  
66 Mode, and the North Atlantic Oscillation:

67 “The climate modes SAM, the IOD and the NAO are the important sources of global climate  
68 variability (Hurrell et al., 2003; Luo et al., 2012; Roxy et al., 2015). For instance, the NAO is the  
69 prominent mode of atmospheric circulation variability over the North Atlantic and surrounding  
70 regions (Delworth et al., 2016; Hurrell et al., 2003) and variations in NAO are crucial for the  
71 environment and society (Hurrell et al., 2003). The IOD affects climate extremes over the Indian  
72 Ocean and surrounding areas (Abram et al., 2008; Kripalani et al., 2009; Kripalani and Kulkarni,  
73 1997) and might cause severe economic consequences (Ummenhofer et al., 2009). The SAM is  
74 the major mode of atmospheric circulation variability in the southern Hemisphere (Cai et al., 2011;  
75 Raphael and Holland, 2006). In addition, changes in these modes may affect the variations of  
76 ENSO (Abram et al., 2020; Cai et al., 2011, 2019; Le et al., 2020; Le and Bae, 2019). Nevertheless,  
77 it is likely that these factors may alter the influences of ENSO on dust activities.”

78 3.6 Lines 80-91: I do not understand the choice of using the “total earth surface” percentage  
79 quantity as a parameter. Especially, this does not make much sense to me when dividing the  
80 study on land areas and ocean areas. It would already give more information by dividing in  
81 % of total ocean surface when considering ocean areas, and % of total land surface when  
82 considering land.

83 **Response:** We thank the reviewer for raising this point. We think choosing only one parameter  
84 “total earth surface” may reduce the confusion. In addition, we may convert the areas between  
85 “total earth surface”, “total land areas” and “total oceans areas” (i.e., “total land areas” is

86 approximately 29.2% of “total earth surface” and “total ocean areas” is approximately 70.8% of  
87 “total earth surface”).

88 We modified these sentences to clarify this point as your suggestion:

89 “Over oceans, the areas affected by ENSO are estimated at approximately 17.6%, 32.3%, and  
90 20.7% of total earth surface (i.e., 24.9%, 45.6% and 29.2% of total ocean areas) for deposition of  
91 dry dust, dust aerosol optical depth, and deposition of wet dust, respectively (Figure 2b). The land  
92 areas affected by ENSO are estimated at approximately 5.1%, 7.5%, and 6.8% of the total earth  
93 surface (i.e., 17.5%, 25.7% and 23.3% of total land areas) for deposition of dry dust, dust aerosol  
94 optical depth, and deposition of wet dust, respectively (Figure 2b).

95 The causal effects of ENSO on seasonal mean dry dust deposition are shown in Figure S1. The  
96 largest impacts of winter (DJF) ENSO are observed in the following spring (MAM), with  
97 approximately 3.4% of total earth surface over land (i.e., 11.6% of total land areas) and  
98 approximately 16% of total earth surface over the ocean (i.e., 22.6% of total ocean areas) are  
99 affected (Figure S2). The impacts of ENSO on dry dust deposition gradually decrease in the  
100 following summer, fall, and winter (Figures S1 and S2). In particular, the influences of ENSO on  
101 winter dry dust deposition are mainly limited in Antarctica (approximately 0.5% of total earth  
102 surface or 1.7% of total land areas) and the tropical Pacific (approximately 0.7% of total earth  
103 surface or 1% of total ocean areas).”

104 3.7 Section 3.2: The authors should explain why there are a different number of models  
105 compared for the different cases (12 models for the ENSO effect on dry deposition, 9 for the  
106 aerosol optical depth, 11 for the dust emission)

107 **Response:** We thank the reviewer for raising this point. We selected all the models with accessible  
108 dust deposition-related data. Considering the total models is somewhat low (i.e., 12 models), we  
109 kept all these models. Dry and wet deposition of dust are key variables which directly affect local  
110 environment, thus we selected all models having these data.

111 We add the following sentences to Section 2.1 to clarify this point:

112 “We limited our study to all the models having both dry dust and wet dust data (i.e., there is total  
113 of 12 models with accessible dry dust and wet dust data as described in Table S2). Dust deposition  
114 on land and ocean surface are important metrics to assess the impacts of dust activities on  
115 ecosystems and environment (Bao et al., 2017; Fan et al., 2006; Jickells et al., 2005; Jiménez et

116 al., 2018; Kanakidou et al., 2018; Schulz et al., 2012). Additional data of od550dust and emidust  
117 supplied by these 12 models provide further understanding of ENSO impacts on dust activities.”

118 3.8 Line 122: It would be worth to mention briefly what is meant by “marine productivity”

119 **Response:** We thank the reviewer for this suggestion. We clarify this sentence as below:

120 “Significant impacts of ENSO on atmospheric aerosol loading (Figures 2a and 5) may lead to a  
121 strong response of marine productivity (i.e., the production of organic matter in the ocean from  
122 carbon dioxide by phytoplankton) to ENSO. For example, there is strong correlation between  
123 aerosol optical depth and iron deposition and satellite chlorophyll (Carslaw et al., 2010; Jickells et  
124 al., 2005).”

125 3.9 Line 134-136: The paper mention before that there is little consensus of the models on the  
126 impact of ENSO on dust emissions. Would it be still possible to draw any relevant  
127 conclusion on the effect of ENSO on dust emissions, including the suggestion of the possible  
128 anthropogenic impact on dust emissions?

129 **Response:** We thank the reviewer for raising this point. We agree that there is still large  
130 uncertainty regarding the effect of ENSO on dust emissions and robust conclusion is not feasible.  
131 We added the following sentence to Section 4 to clarify this point:

132 “As the consistency between models is low (Figure 3), large uncertainties remain for the causal  
133 impacts of ENSO on dust emissions.”

134 We agree that the role of human activity on global dust activities is not supported by the results of  
135 this manuscript. This discussion is the inference of the main results as shown in Figures 3 and 6.  
136 Here, we tried to discuss this point rather than drawing a conclusion. We rewrote this discussion  
137 to avoid confusing the readers.

138 We also added the following sentence to Section 4 to motivate further works:

139 “Hence, the impacts of human activities and changes in land use on regional dust emissions might  
140 be a topic of future works.”

## 141 **References**

142 Abram, N. J., Gagan, M. K., Cole, J. E., Hantoro, W. S. and Mudelsee, M.: Recent intensification  
143 of tropical climate variability in the Indian Ocean, *Nat. Geosci.*, 1(12), 849–853,  
144 doi:10.1038/ngeo357, 2008.

145 Abram, N. J., Wright, N. M., Ellis, B., Dixon, B. C., Wurtzel, J. B., England, M. H., Ummenhofer,  
146 C. C., Philibosian, B., Cahyarini, S. Y., Yu, T.-L., Shen, C.-C., Cheng, H., Edwards, R. L. and  
147 Heslop, D.: Coupling of Indo-Pacific climate variability over the last millennium, *Nature*,  
148 579(7799), 385–392, doi:10.1038/s41586-020-2084-4, 2020.

149 Bao, H., Niggemann, J., Luo, L., Dittmar, T. and Kao, S. J.: Aerosols as a source of dissolved  
150 black carbon to the ocean, *Nat. Commun.*, 8(1), doi:10.1038/s41467-017-00437-3, 2017.

151 Boy, J. and Wilcke, W.: Tropical Andean forest derives calcium and magnesium from Saharan  
152 dust, *Global Biogeochem. Cycles*, 22(1), 1–11, doi:10.1029/2007GB002960, 2008.

153 Cai, W., Sullivan, A. and Cowan, T.: Interactions of ENSO, the IOD, and the SAM in CMIP3  
154 Models, *J. Clim.*, 24(6), 1688–1704, doi:10.1175/2010JCLI3744.1, 2011.

155 Cai, W., Wu, L., Lengaigne, M., Li, T., McGregor, S., Kug, J.-S., Yu, J.-Y., Stuecker, M. F.,  
156 Santoso, A., Li, X., Ham, Y.-G., Chikamoto, Y., Ng, B., McPhaden, M. J., Du, Y., Dommenges,  
157 D., Jia, F., Kajtar, J. B., Keenlyside, N., Lin, X., Luo, J.-J., Martín-Rey, M., Ruprich-Robert, Y.,  
158 Wang, G., Xie, S.-P., Yang, Y., Kang, S. M., Choi, J.-Y., Gan, B., Kim, G.-I., Kim, C.-E., Kim,  
159 S., Kim, J.-H. and Chang, P.: Pantropical climate interactions, *Science* (80-. ), 363(6430),  
160 eaav4236, doi:10.1126/science.aav4236, 2019.

161 Carslaw, K. S., Boucher, O., Spracklen, D. V., Mann, G. W., Rae, J. G. L., Woodward, S. and  
162 Kulmala, M.: A review of natural aerosol interactions and feedbacks within the Earth system,  
163 *Atmos. Chem. Phys.*, 10(4), 1701–1737, doi:10.5194/acp-10-1701-2010, 2010.

164 Delworth, T. L., Zeng, F., Vecchi, G. A., Yang, X., Zhang, L. and Zhang, R.: The North Atlantic  
165 Oscillation as a driver of rapid climate change in the Northern Hemisphere, *Nat. Geosci.*, 9(7),  
166 509–512, doi:10.1038/ngeo2738, 2016.

167 Fan, S. M., Moxim, W. J. and Levy, H.: Aeolian input of bioavailable iron to the ocean, *Geophys.*  
168 *Res. Lett.*, 33(7), 2–5, doi:10.1029/2005GL024852, 2006.

169 Huang, Y., Liu, X., Yin, Z. Y. and An, Z.: Global Impact of ENSO on Dust Activities with  
170 Emphasis on the Key Region from the Arabian Peninsula to Central Asia, *J. Geophys. Res. Atmos.*,  
171 126(9), 1–24, doi:10.1029/2020JD034068, 2021.

172 Hurrell, J. W., Kushnir, Y., Ottersen, G. and Visbeck, M.: An overview of the North Atlantic  
173 Oscillation, in *Geophysical Monograph American Geophysical Union*, pp. 1–35, American  
174 Geophysical Union., 2003.

175 Jeong, J. I., Park, R. J. and Yeh, S. W.: Dissimilar effects of two El Niño types on PM2.5

176 concentrations in East Asia, *Environ. Pollut.*, 242, 1395–1403, doi:10.1016/j.envpol.2018.08.031,  
177 2018.

178 Jickells, T. D., An, Z. S., Andersen, K. K., Baker, A. R., Bergametti, C., Brooks, N., Cao, J. J.,  
179 Boyd, P. W., Duce, R. A., Hunter, K. A., Kawahata, H., Kubilay, N., LaRoche, J., Liss, P. S.,  
180 Mahowald, N., Prospero, J. M., Ridgwell, A. J., Tegen, I. and Torres, R.: Global iron connections  
181 between desert dust, ocean biogeochemistry, and climate, *Science* (80-. ), 308(5718), 67–71,  
182 doi:10.1126/science.1105959, 2005.

183 Jiménez, L., Rühland, K. M., Jeziorski, A., Smol, J. P. and Pérez-Martínez, C.: Climate change  
184 and Saharan dust drive recent cladoceran and primary production changes in remote alpine lakes  
185 of Sierra Nevada, Spain, *Glob. Chang. Biol.*, 24(1), e139–e158, doi:10.1111/gcb.13878, 2018.

186 Kanakidou, M., Myriokefalitakis, S. and Tsigaridis, K.: Aerosols in atmospheric chemistry and  
187 biogeochemical cycles of nutrients, *Environ. Res. Lett.*, 13(6), doi:10.1088/1748-9326/aabcbd,  
188 2018.

189 Kripalani, R. H. and Kulkarni, A.: Rainfall variability over South-East Asia - Connections with  
190 Indian monsoon and Enso extremes: New perspectives, *Int. J. Climatol.*, 17(11), 1155–1168,  
191 doi:10.1002/(SICI)1097-0088(199709)17:11<1155::AID-JOC188>3.0.CO;2-B, 1997.

192 Kripalani, R. H., Oh, J. H. and Chaudhari, H. S.: Delayed influence of the Indian Ocean Dipole  
193 mode on the East Asia-West Pacific monsoon: possible mechanism, *Int. J. Climatol.*, 30(2), 197–  
194 209, doi:10.1002/joc.1890, 2009.

195 Le, T. and Bae, D.-H. H.: Causal links on interannual timescale between ENSO and the IOD in  
196 CMIP5 future simulations, *Geophys. Res. Lett.*, 46(5), 1–9, doi:10.1029/2018GL081633, 2019.

197 Le, T., Ha, K.-J. J., Bae, D.-H. H. and Kim, S.-H. H.: Causal effects of Indian Ocean Dipole on El  
198 Niño-Southern Oscillation during 1950-2014 based on high-resolution models and reanalysis data,  
199 *Environ. Res. Lett.*, 15(10), 1040b6, doi:10.1088/1748-9326/abb96d, 2020.

200 Luo, J.-J., Sasaki, W. and Masumoto, Y.: Indian Ocean warming modulates Pacific climate  
201 change, *Proc. Natl. Acad. Sci.*, 109(46), 18701–18706, doi:10.1073/pnas.1210239109, 2012.

202 Mosedale, T. J., Stephenson, D. B., Collins, M. and Mills, T. C.: Granger Causality of Coupled  
203 Climate Processes: Ocean Feedback on the North Atlantic Oscillation, *J. Clim.*, 19(7), 1182–1194,  
204 doi:10.1175/JCLI3653.1, 2006.

205 Raphael, M. N. and Holland, M. M.: Twentieth century simulation of the southern hemisphere  
206 climate in coupled models. Part 1: Large scale circulation variability, *Clim. Dyn.*, 26(2–3), 217–

207 228, doi:10.1007/s00382-005-0082-8, 2006.

208 Roxy, M. K., Ritika, K., Terray, P., Murtugudde, R., Ashok, K. and Goswami, B. N.: Drying of  
209 Indian subcontinent by rapid Indian ocean warming and a weakening land-sea thermal gradient,  
210 Nat. Commun., 6(May), 7423, doi:10.1038/ncomms8423, 2015.

211 Schulz, M., Prospero, J. M., Baker, A. R., Dentener, F., Ickes, L., Liss, P. S., Mahowald, N. M.,  
212 Nickovic, S., García-Pando, C. P., Rodríguez, S., Sarin, M., Tegen, I. and Duce, R. A.:  
213 Atmospheric transport and deposition of mineral dust to the ocean: Implications for research needs,  
214 Environ. Sci. Technol., 46(19), 10390–10404, doi:10.1021/es300073u, 2012.

215 Schwarz, G.: Estimating the dimension of a model, Ann. Stat. [online] Available from:  
216 <http://projecteuclid.org/euclid.aos/1176344136> (Accessed 30 May 2014), 1978.

217 Shao, Y., Klose, M. and Wyrwoll, K.-H.: Recent global dust trend and connections to climate  
218 forcing, J. Geophys. Res. Atmos., 118(19), 11,107-11,118, doi:10.1002/jgrd.50836, 2013.

219 Stern, D. I. and Kaufmann, R. K.: Anthropogenic and natural causes of climate change, Clim.  
220 Change, 122(1–2), 257–269, doi:10.1007/s10584-013-1007-x, 2013.

221 Ummenhofer, C. C., England, M. H., McIntosh, P. C., Meyers, G. A., Pook, M. J., Risbey, J. S.,  
222 Sen Gupta, A. and Taschetto, A. S.: What causes southeast Australia’s worst droughts?, Geophys.  
223 Res. Lett., 36(4), L04706, doi:10.1029/2008GL036801, 2009.

224
